# Supplementary material
Source: PubMed Central journal article supplement (PMC5786724)
Supplement: JCM.01239-17_zjm999095799s1.pdf [file JCM.01239-17_zjm999095799s1.pdf]

**Mutation-enriched Sanger sequencing.** The PCR components for *katG* gene were as follows: 25 $\mu$ L PCR reaction contained 1 $\times$  PCR buffer [75 mM Tris-HCl (pH 9.0), 20 mM (NH<sub>4</sub>)<sub>2</sub>SO<sub>4</sub>, and 0.01% (V/V) Tween 20], 4.0 mM MgCl<sub>2</sub>, 0.2 mM dNTPs, 0.06  $\mu$ M katG-F2, 1.2  $\mu$ M katG-R, 0.16  $\mu$ M katG-P, 1 U KlenTaq-S DNA polymerase, and 5  $\mu$ L template. The PCR components for *inhA* promoter were as follows: 25 $\mu$ L PCR reaction contained 1 $\times$  PCR buffer [75 mM Tris-HCl (pH 9.0), 20 mM (NH<sub>4</sub>)<sub>2</sub>SO<sub>4</sub>, and 0.01% (V/V) Tween 20], 4.0 mM MgCl<sub>2</sub>, 0.2 mM dNTPs, 0.06  $\mu$ M inhA-F, 0.6  $\mu$ M inhA-R, 0.16  $\mu$ M inhA-P, 1 U KlenTaq-S DNA polymerase, and 5  $\mu$ L template. The PCR components for *ahpC* promoter were as follows: 25 $\mu$ L PCR reaction contained 1 $\times$  PCR buffer [75 mM Tris-HCl (pH 9.0), 20 mM (NH<sub>4</sub>)<sub>2</sub>SO<sub>4</sub>, and 0.01% (V/V) Tween 20], 4.0 mM MgCl<sub>2</sub>, 0.2 mM dNTPs, 0.08  $\mu$ M ahpC-F, 1.0  $\mu$ M ahpC-R, 0.16  $\mu$ M ahpC-P1 and 0.16  $\mu$ M ahpC-P2, 1 U KlenTaq-S DNA polymerase, and 5  $\mu$ L template. The PCR conditions were identical: step 1, denaturation at 95  $^{\circ}$ C for 3 min, step 2, 95  $^{\circ}$ C for 10 s, 61  $^{\circ}$ C for 15 s, and 68  $^{\circ}$ C for 30 s, repeated 50 cycles. PCR products were sent out for bidirectional sequencing using the forward and reverse primers for each gene (Sangon Inc., Shanghai, China).

Table S1 Sequences of primers and probes used in the DeepMelt TB/INH assay

| Name <sup>a</sup>    | Target               | Sequence (5'-3') <sup>c</sup>             |
|----------------------|----------------------|-------------------------------------------|
| katG-F1 <sup>b</sup> |                      | CGTCGGCGGTCACACTTTCGGTAAGA                |
| katG-F2 <sup>b</sup> | <i>katG</i>          | CACCGGAACCGGTAAGGACGCG                    |
| katG-R               |                      | TCGTCAGCTCCCACCTCGTAGCCGTA                |
| inhA-F               | <i>inhA</i> promoter | CGTTACGCTCGTGGACATACCGATTT                |
| inhA-R               |                      | GGGATACGAATGGGGGTTTGGCCCCTTCA             |
| ahpC-F               | <i>ahpC</i> promoter | GCCACGGCCGGCTAGCACCTCTTG                  |
| ahpC-R               |                      | GCATGACTCTCCTCATCATCAAAGC                 |
| katG-P               | <i>katG</i> 315      | FAM-TCGATCACC <u>AGCGGC</u> ATCGAG-BHQ1   |
| inhA-P               | <i>inhA</i> -17~-8   | ROX-GCGGCGAG <u>ACGATAGG</u> TTGTC-BHQ2   |
| ahpC-P1              | <i>ahpC</i> -44~-30  | HEX-ATA <u>TATCACCTTTGCCT</u> GACAGC-BHQ1 |
| ahpC-P2              | <i>ahpC</i> -15~-4   | BHQ2-ACGGCA <u>CGATGGA</u> ATGTCGCA-Cy5   |

<sup>a</sup> F, forward primer; R, reverse primer; P, probe.

<sup>b</sup> katG-F1 and katG-F2 were used in the singleplex and multiplex assay, respectively.

<sup>c</sup> Underlined bases in the probe sequences represent locked nucleic acid (LNA) modification.
